# Supplementary material for: Views of general practitioners on end-of-life care learning preferences: A systematic review
Source: Research Square preprint supplement (doi:10.21203/rs.3.rs-1382711/v1), 2022-03-17
Supplement: Supplementary file 3 [file 86fab39cc09033247f10fba2.pdf]

## Appendix 4: Systematic review themes and subthemes

| Themes                                                                                 | Subthemes                              | Explanatory Narrative                                                                                                                                                                                                                                                                                                                                                                                                                                                                                                                                                                                                                                                                                                                                                                                                                                                                              |
|----------------------------------------------------------------------------------------|----------------------------------------|----------------------------------------------------------------------------------------------------------------------------------------------------------------------------------------------------------------------------------------------------------------------------------------------------------------------------------------------------------------------------------------------------------------------------------------------------------------------------------------------------------------------------------------------------------------------------------------------------------------------------------------------------------------------------------------------------------------------------------------------------------------------------------------------------------------------------------------------------------------------------------------------------|
| <b>Theme 1:</b><br><b>Motivating factors that trigger learning in end-of-life care</b> | Disposition to provide palliative care | Positive attitude towards helping palliative patients(Slort et al, 2011 [42]) )Rhee et al, 2018 [45]) ( Jhonston et al, 2001 [55], Rhee et al., 2018 [45]), Comfort in providing palliative care (Rhee et al., 2018 [45]), Being humane to patient's concern(O'Connor et al, 2014 [38]), improve quality of life of palliative patients (O'Connor et al, 2006 [37]), more experience and higher clientele (Barcley et al, 2003 [49]) (Rhee et al, 2008 [44]) (Junger et al, 2010 [47]), older GPs are able to focus on their interest areas have more older and sicker patients(Barcley et al, 2003 [49]), GPs with experience in home care would prefer learning palliative care(Barcley et al, 2003 [49]) (Jhonston et al, 2001 [55]) (Slort et al, 2011 [42])                                                                                                                                   |
|                                                                                        | Self-actualization                     | Palliative care as valuable part of their care(Meijler er al, 2005 [46])(Lloyd-William et al, 2006 [54]) (Hermann et al, 2019 [36]) (Junger et al, 2010 [47]), intuition that they will be able to help the dying patient(Junger et al, 2010 [47]),<br>Need for an attitudinal shift from "cure to care" in order to look beyond the usual framework of a diagnosis, a therapy and making somebody better (Pype et al, 2014 (a) [23]), training in palliative care helps become a good physician(Meijler et al, 2005 [46]), Recourse to guilt from previous failures to alleviate symptoms(O'Connor et al, 2006 [37]), Feeling and understanding that personal loss helps empathize with patients better(O'Connor et al, 2014 [38]), need for coping with powerlessness, helplessness and emotional burden of caring(Selman et al, 2017 [22] (Hermann et al, 2019 [36]) (Meijler et al, 2005 [46]) |
|                                                                                        | Relevance to clinical practice         | GPs trained with specialists if they felt the specialists had the skills and preference relevant to their practice(Shipman et al, 2002 [52]) (Ability to deal with)Complexity of end of life care(Selman et al, 2017 [22])<br>Deficiency in knowledge and skills(Barcley et al, 2003 [49])<br>Fear of treading unknown territory(Taubert et al, 2011 [43])<br>Confidence in prescribing analgesia triggers more learning(Shipman et al, 2001 [51])<br>Attrition of skills over time(Selman et al, 2017 [22])(Pype et al, 2014 (b) [24]) due to lack of ongoing exposure to palliative care patients or due to referral to specialists or GP colleague with interest(Selman et al, 2017 [22])<br>Lack of expertise in addressing specific aspects such as spiritual and religious concerns (Assing Hvidt et al. 2016 [39])                                                                          |
|                                                                                        | Feeling responsible                    | Generalist must be specialists in EOLC(Selman et al, 2017 [22])<br>Central to coordinating palliative care for patients in the community (Lloyd-William et al, 2006 [54])<br>Feel committed to caring for their patients as a trusted key person who accompanies the family for many years (Junger et al, 2010 [47])<br>Feeling palliative care as their core responsibility (Pype et al, 2014 (a) [23]) (O'Connor et al, 2006 [37])                                                                                                                                                                                                                                                                                                                                                                                                                                                               |

|  |                  |                                                                                                                                                                                                                                                                                                                                                                                                                                                                                                                                                                                                                                                                                                                                                                                                                                                                                                                                                                                                                                                                                                                                                                                                                                                                                                                                                                                                                                               |
|--|------------------|-----------------------------------------------------------------------------------------------------------------------------------------------------------------------------------------------------------------------------------------------------------------------------------------------------------------------------------------------------------------------------------------------------------------------------------------------------------------------------------------------------------------------------------------------------------------------------------------------------------------------------------------------------------------------------------------------------------------------------------------------------------------------------------------------------------------------------------------------------------------------------------------------------------------------------------------------------------------------------------------------------------------------------------------------------------------------------------------------------------------------------------------------------------------------------------------------------------------------------------------------------------------------------------------------------------------------------------------------------------------------------------------------------------------------------------------------|
|  |                  | Responsible for keeping patients free of pain and discomfort( <b>Pyte et al, 2014 (b) [24]</b> )<br>Sense of responsibility to support bereaved family ( <b>O'Connor et al, 2014 [38]</b> )                                                                                                                                                                                                                                                                                                                                                                                                                                                                                                                                                                                                                                                                                                                                                                                                                                                                                                                                                                                                                                                                                                                                                                                                                                                   |
|  | Therapeutic bond | Providing care for a prolonged period for patients ( <b>Barcley et al, 2003 [49]</b> ) ( <b>Shipman et al, 2001 [51]</b> ) ( <b>Rhee et al, 2018 [45]</b> ) from birth to end-of-life ( <b>Junger et al, 2010 [47]</b> ) or from diagnosis to end-of-life( <b>O'Connor et al, 2006 [37]</b> ) and for patients known to them in the past( <b>Rhee et al, 2018 [45]</b> ) ( <b>O'Connor et al, 2006 [37]</b> ) eases palliative care provision( <b>Rhee et al, 2018 [45]</b> )<br>Strong bond that developed with long standing patient-GP relationship( <b>Slort et al, 2011 [42]</b> ) ( <b>Shipman et al, 2001 [51]</b> ) ( <b>O'Connor et al, 2014 [38]</b> ) ( <b>Rhee et al, 2008 [44]</b> ) ( <b>Rhee et al, 2018 [45]</b> ) ( <b>Pyte et al, 2014 (a)[23]</b> ) ( <b>Lloyd-William et al, 2006 [54]</b> ) ( <b>Hermann et al, 2019 [36]</b> ) leads to better awareness of palliative care needs of the patients( <b>Shipman et al, 2001 [51]</b> )<br>Awareness of social and family background helps address patient's needs better( <b>O'Connor et al, 2006 [37]</b> , <b>Connor et al, 2014[38]</b> )<br>They believed in helping a patient as a whole person and not as a disease entity ( <b>Junger et al., 2010 [47]</b> ) and felt the need to address the complex sufferings of patients while honoring their dignity, expectations, and wishes ( <b>Slort et al., 2011 [42]</b> ) ( <b>Assing Hvidt et al., 2016 [39]</b> ). |

| Themes                                                        | Subthemes                        | Explanatory Narratives                                                                                                                                                                                                                                                                                                                                                                                                                                                                                                                                                                                                                                                                                                                                                                                                   |
|---------------------------------------------------------------|----------------------------------|--------------------------------------------------------------------------------------------------------------------------------------------------------------------------------------------------------------------------------------------------------------------------------------------------------------------------------------------------------------------------------------------------------------------------------------------------------------------------------------------------------------------------------------------------------------------------------------------------------------------------------------------------------------------------------------------------------------------------------------------------------------------------------------------------------------------------|
| <b>Theme 2:</b><br><br><b>End-of-life care learning needs</b> | <b>Accessing palliative care</b> | Needs for identification and referral for palliative care( <b>Selman et al., 2017 [22]</b> )<br>Need for awareness about local specialist services and resources( <b>Selman et al., 2017 [22]</b> , <b>Hermann et al., 2019 [36]</b> ) ( <b>Junger et al., 2010 [47]</b> ), local systems and frameworks for navigation( <b>Selman et al., 2017 [22]</b> )<br>Clarity in roles, responsibilities and teamwork ( <b>Selman et al., 2017 [22]</b> )<br>Guidelines on out-of-hours care( <b>Selman et al., 2017[22]</b> )<br>Guidelines for effective planning and provision of EOLC( <b>Rhee et al., 2018 [45]</b> )<br>Guidelines on when to refer to specialists or other resources( <b>O'Connor et al., 2014 [38]</b> )<br>Importance of and how to build a multidisciplinary team( <b>O'Connor et al., 2006 [37]</b> ) |

|  |                                                           |                                                                                                                                                                                                                                                                                                                                                                                                                                                                                                                                                                                                                                                                                                                                                                                                                                                                                                                                                                                                                                                                                                                                                                                                                                                                                                                                                                                                                                                                                                                                                                                                                                                                                                                                                                                                                                                                                                                                                                                                                                                                                                                                                                                                                                                                                                                                                               |
|--|-----------------------------------------------------------|---------------------------------------------------------------------------------------------------------------------------------------------------------------------------------------------------------------------------------------------------------------------------------------------------------------------------------------------------------------------------------------------------------------------------------------------------------------------------------------------------------------------------------------------------------------------------------------------------------------------------------------------------------------------------------------------------------------------------------------------------------------------------------------------------------------------------------------------------------------------------------------------------------------------------------------------------------------------------------------------------------------------------------------------------------------------------------------------------------------------------------------------------------------------------------------------------------------------------------------------------------------------------------------------------------------------------------------------------------------------------------------------------------------------------------------------------------------------------------------------------------------------------------------------------------------------------------------------------------------------------------------------------------------------------------------------------------------------------------------------------------------------------------------------------------------------------------------------------------------------------------------------------------------------------------------------------------------------------------------------------------------------------------------------------------------------------------------------------------------------------------------------------------------------------------------------------------------------------------------------------------------------------------------------------------------------------------------------------------------|
|  | <p><b>Pain and symptom management</b></p>                 | <p>Need for training in other symptoms management(<b>Barclay et al., 2003 [49]</b>) (<b>Becker et al., 2010 [40]</b>) (<b>Straatman et al., 2013 [41]</b>) (<b>Shipman et al., 2002 [52]</b>, (<b>Pype et al., 2014(b) [24]</b>) (<b>Connor et al., 2006 [37]</b>) (<b>Lloyd-Williams et al., 2006[37]</b>)</p> <p>Palliative care emergencies(<b>Magee &amp; Koffman, 2016 [48]</b>)</p> <p>Preference for treating symptoms that they could treat with drugs(<b>Jhonston et al., 2001 [55]</b>)</p> <p>Symptom control in non-malignant conditions(<b>Shipman et al., 2001 [51]</b>) (<b>Magee and Koffman, 2016 [48]</b>)</p> <p>Management of nausea/vomiting(<b>Shipman et al., 2001 [51]</b>) (<b>Meijler et al., 2005 [46]</b>)</p> <p>Management of agitated delirium and complications, dyspnoea(<b>Samaroo et al., 1993 [53]</b>) (<b>Rhee et al., 2008 [44]</b>), <b>Magee and Koffman, 2016 [48]</b>, (<b>Meijler et al., 2005 [46]</b>)</p> <p>Management of hypoxia and insomnia(<b>Wakefield et al., 1993 [50]</b>, <b>Meijler et al., 2005 [46]</b>)</p> <p>Psychosocial issues of terminally ill patients(<b>Wakefield et al., 1993 [50]</b>) (<b>Rhee et al., 2008 [44]</b>) (<b>Pype et al., 2014(b) [24]</b>) (<b>O'Connor et al., 2006 [37]</b>) (<b>Lloyd-Williams et al., 2006 [54]</b>) and withdrawal symptoms(<b>Samaroo et al., 1993 [53]</b>)</p> <p>Distinguishing adjustment disorder from sadness (<b>Meijler et al., 2005 [46]</b>)</p> <p>Challenges in distinguishing delirium, fear of dying or anxiety(<b>Meijler et al., 2005[46]</b>, <b>Jhonston et al., 2001 [55]</b>)</p> <p>Handling the emotional distress of patients such as fear(<b>Slort et al., 2011 [42]</b>) (<b>Connor et al., 2006 [37]</b>) anger, demanding behavior (<b>Samaroo et al., 1993 [53]</b>)</p> <p>Need for assessment and provision of nutrition support(<b>Straatman et al., 2013 [41]</b>, <b>Meijler et al., 2005 [46]</b>), parenteral/PEG feeding(<b>Meijler et al., 2005 [46]</b>)</p> <p>Other symptoms such as anorexia, fatigue, incontinence, unpleasant smell (<b>Jhonston et al., 2001 [55]</b>)</p> <p>Need for training in addressing spiritual needs of patients(<b>Straatman et al., 2013 [41]</b>, <b>Pype et al., 2014(b) [24]</b>, <b>Jhonston et al., 2001 [55]</b>) and religion(<b>Pype et al., 2014(b)[24]</b>)</p> |
|  | <p><b>Communication skills and compassionate care</b></p> | <p>How to facilitate decision making in life limiting conditions(<b>Junger et al., 2010 [47]</b>)</p> <p>Training in breaking bad news to patients/family(<b>Shipman et al., 2001 [51]</b>) (<b>Pype et al., 2014(a) [23]</b>) (<b>O'Connor et al., 2006 [37]</b>) (<b>Meijler et al., 2005 [46]</b>)</p> <p>Communication skills in counselling patients transitioning from curative to palliative care(<b>Meijler et al., 2005 [46]</b>) (<b>Magee &amp; Koffman, 2016 [48]</b>)</p> <p>Skill building in handling difficult conversation especially in time constraints(<b>Selman et al., 2017 [22]</b>)</p>                                                                                                                                                                                                                                                                                                                                                                                                                                                                                                                                                                                                                                                                                                                                                                                                                                                                                                                                                                                                                                                                                                                                                                                                                                                                                                                                                                                                                                                                                                                                                                                                                                                                                                                                               |

|  |                                         |                                                                                                                                                                                                                                                                                                                                                                                                                                                                                                                                                                                                                                                                                                                                                                                                                                                                                                                                  |
|--|-----------------------------------------|----------------------------------------------------------------------------------------------------------------------------------------------------------------------------------------------------------------------------------------------------------------------------------------------------------------------------------------------------------------------------------------------------------------------------------------------------------------------------------------------------------------------------------------------------------------------------------------------------------------------------------------------------------------------------------------------------------------------------------------------------------------------------------------------------------------------------------------------------------------------------------------------------------------------------------|
|  |                                         | <p>Challenges of handling troublesome relationship with patients(<b>Slort et al., 2011 [42]</b>)</p> <p>Challenges of handling patient-relative conflicts(<b>Slort et al., 2011 [42]</b>) (<b>O'Connor et al., 2006 [37]</b>) (<b>Meijler et al., 2005 [46]</b>)</p> <p>Training to deal with resistant patient/family (<b>Selman et al., 2017 [22]</b>) in denial/ bargaining(<b>O'Connor et al., 2006 [37]</b>) (<b>Meijler et al., 2005 [46]</b>) (<b>Hermann et al., 2019 [36]</b>)</p> <p>To learn how to use right attitude, diplomacy, skills/tactics to deal with difficult situation with family(<b>O'Connor et al., 2006 [37]</b>), <b>Meijler et al., 2005 [46]</b>)</p> <p>Need to understand how to tailor information conveyed to family(<b>O'Connor et al., 2006 [37]</b>)</p> <p>To tackle vulnerability and apprehensions related to communication around death and dying (<b>Junger et al., 2010 [47]</b>)</p> |
|  | <b>Address caregiver needs</b>          | <p>Handling the emotional distress of the relatives(<b>Wakefield et al., 1993 [50]</b>) (<b>Meijler et al., 2005 [46]</b>)</p> <p>Bereavement support of caregivers(<b>Wakefield et al., 1993 [50]</b>) (<b>Lloyd-William et al., 2006 [54]</b>) (<b>Jhonston et al., 2001 [55]</b>) (<b>Junger et al., 2010 [47]</b>)</p> <p>Need of differentiation between grief reaction and depression(<b>O'Connor et al., 2014 [38]</b>)</p> <p>Resolving family's anticipatory grief when in denial(<b>O'Connor et al., 2006 [37]</b>)</p>                                                                                                                                                                                                                                                                                                                                                                                                |
|  | <b>Ethical and Medico-legal aspects</b> | <p>To provide care in patient's best interest(<b>Selman et al., 2017 [22]</b>) respecting patient's wishes and expectations(<b>Slort et al., 2011 [42]</b>)</p> <p>To understand the ethical norms and values(<b>Meijler et al., 2005 [46]</b>)</p> <p>How to discuss ethical aspects of care to patients/family and colleagues(<b>Meijler et al., 2005 [46]</b>)</p> <p>Need for training in medicolegal aspects of palliative care(<b>Rhee et al., 2018 [45]</b>)</p>                                                                                                                                                                                                                                                                                                                                                                                                                                                          |
|  | <b>Teamwork</b>                         | <p>Sharing of responsibility (<b>Straatman et al., 2013 [41]</b>)</p> <p>Debriefing with colleagues(<b>Straatman et al., 2013 [41]</b>) (<b>Junger et al., 2010 [47]</b>) in an emotionally draining situation in practice(<b>Hermann et al., 2019 [36]</b>)</p> <p>To develop coping strategies(<b>Becker et al., 2010 [40]</b>) (<b>Junger et al., 2010 [47]</b>)</p> <p>To deal with coping in special situation such as loss of children cared for(<b>O'Connor et al., 2006 [37]</b>) or with children of similar age as theirs (<b>O'Connor et al., 2006 [37]</b>)</p> <p>For younger GPs who may be still developing their personal views on death and dying(<b>O'Connor et al., 2006 [37]</b>)</p> <p>Need for mutual support from multidisciplinary team/specialists(<b>Junger et al., 2010 [47]</b>)</p>                                                                                                                |

| Theme | Subtheme | Explanatory Narratives |
|-------|----------|------------------------|
|-------|----------|------------------------|

|                                                           |                                                       |                                                                                                                                                                                                                                                                                                                                                                                                                                                                                                                                                                                                                                                                                                                                                                                                                                                                                                                                                                                                                                                                                                                                                                                                                                                                                                                                                                                                                                                                                                                                                                                                                             |
|-----------------------------------------------------------|-------------------------------------------------------|-----------------------------------------------------------------------------------------------------------------------------------------------------------------------------------------------------------------------------------------------------------------------------------------------------------------------------------------------------------------------------------------------------------------------------------------------------------------------------------------------------------------------------------------------------------------------------------------------------------------------------------------------------------------------------------------------------------------------------------------------------------------------------------------------------------------------------------------------------------------------------------------------------------------------------------------------------------------------------------------------------------------------------------------------------------------------------------------------------------------------------------------------------------------------------------------------------------------------------------------------------------------------------------------------------------------------------------------------------------------------------------------------------------------------------------------------------------------------------------------------------------------------------------------------------------------------------------------------------------------------------|
| <b>Theme 3:</b><br><b>Preference for a learning style</b> | Learning from experience and<br>Experiential learning | <p>Expertise grows with years of experience(Assing Hvidt et al., 2016 [39]) (Selman et al, 2017 [22]) (Pype et al., 2014(a) [23]) (O'Connor et al., 2006 [37]) (Lloyd-Williams et al., 2006 [54])</p> <p>Expertise grows through patient-GP relationship(Assing Hvidt et al., 2016 [39]) (Pype et al., 2014(a) [23])</p> <p>Real time exposure in the workplace to palliative care helps gain confidence(Rhee et al., 2018 [45]) (Pype et al., 2014(b) [24]) (O'Connor et al, 2014 [37]), Hermann et al., 2019 [36])</p> <p>Intuition and gut feelings helps address certain areas such as spirituality(Assing Hvidt et al., 2016 [39])</p> <p>Need for learning through experience in a mentored environment(Selman et al., 2017 [22]) and from experienced general practitioners (Selman et al, 2017 [22]) (Rhee et al, 2018 [45]) (Meijler et al, 2005 [46]) (Magee and Koffman, 2016 [48])</p> <p>Providing shared care with specialist palliative care team(Selman et al., 2017 [22]) (Rhee et al., 2018 [45]) helps shifts to more proactive style of treating (Pype et al., 2014(a) [23])</p> <p>Attending planning meetings with specialists(Pype et al, 2014 (a)[23])</p> <p>Palliative care needs to be integrated into primary care(Rhee et al., 2018 [45]) (Hermann et al., 2019 [36])</p> <p>Learning from peer from different disciplines (Becker et al., 2010 [40]) (Selman et al., 2017 [22]) (Lloyd-Williams et al., 2006 [54]) (Magee and Koffman, 2016 [48])</p> <p>Learning from relatives who have gone through caring for palliative patients(Selman et al.,2017 [22]) (Pype et al., 2014(a)[23])</p> |
|                                                           | Pragmatic learning style                              | <p>Reflection on one's practice under the guidance of specialists(Pype et al. 2014(a) [23]) (Pype et al. 2014(b) [24])</p> <p>Applying the principles of palliative care in practice and getting feed-back(O'Connor et al., 2014 [38])</p> <p>Learn from one's mistakes and non-success(Taubert et al., 2011 [43]) (Pype et al, 2014(b) [24])</p> <p>Reflection on one's practice of communication with specialists (Pype et al., 2014 (b) [24])</p> <p>Hands-on interactional training under a mentor (Selman et al, 2017 [22]) (Hermann et al., 2019 [36]) (Rhee et al , 2018, [45])</p> <p>Problem-based learning through follow up (Taubert et al., 2011 [43]) (Meijler et al., 2005 [46])</p> <p>Case-based learning(Junger et al.,2010 [47]) (Pype et al., 2014 (a) [23])( Magee and Koffman, 2016 [48]) through telephonic or face-face contact(Shipman et al., 2002 [52]), Selman et al.,2017 [22]) sometimes also calls for instant discussion considering variability in patient needs (Pype et al., 2014(a) [23])</p> <p>Cased based discussion with specialists by patient's bedside(Samaroo et al., 1993 [53]) (Rhee et al., 2018 [45]) (Jhonston et al., 2001 [55])</p> <p>Learning by auditing data(Jhonston et al., 2001 [55])</p>                                                                                                                                                                                                                                                                                                                                                                          |
|                                                           | Self-learning                                         | <p>Internet based/text book based learning (O'Connor et al., 2006 [37]) (Hermann et al., 2019 [36]) (Straatman et al., 2013 [41]) (Taubert et al., 2011 [43]) (Rhee et al., 2008 [45]) (Magee and Koffman, 2016 [48])</p>                                                                                                                                                                                                                                                                                                                                                                                                                                                                                                                                                                                                                                                                                                                                                                                                                                                                                                                                                                                                                                                                                                                                                                                                                                                                                                                                                                                                   |

|  |                   |                                                                                                                                                                                                                                                                                                                                                                                                                                                                                                                                                                                                      |
|--|-------------------|------------------------------------------------------------------------------------------------------------------------------------------------------------------------------------------------------------------------------------------------------------------------------------------------------------------------------------------------------------------------------------------------------------------------------------------------------------------------------------------------------------------------------------------------------------------------------------------------------|
|  |                   | <p>Computer based learning(<b>Jhonston et al., 2001 [55]</b>)</p> <p>Correspondence learning(<b>Straatman et al., 2013 [41]</b>)</p> <p>Reference to guidelines(<b>Shipman et al., 2002 [52]</b>) (<b>Samaroo et al., 1993 [53]</b>)</p> <p>E-learning as cost effective and flexible(<b>Selman et al., 2017 [22]</b>)</p> <p>Self-learning modules(<b>Samaroo et al., 1993 [53]</b>) (<b>Rhee et al., 2008 [44]</b>) (<b>Pype et al., 2014(b) [24]</b>) (<b>O'Connor et al., 2014 [38]</b>) (<b>Junger et al., 2010 [47]</b>)</p> <p>Learning by researching(<b>Jhonston et al., 2001 [55]</b>)</p> |
|  | Didactic learning | <p>Learning by listening (<b>Junger et al., 2010 [47]</b>) (<b>Lloyd-William et al., 2006 [54]</b>) (<b>Jhonston et al., 2001 [55]</b>) and observing(for topics like team building, religious and psychological topics)(<b>Pype et al., 2014(a) [23]</b>), (<b>O'Connor et al., 2014[38]</b>)</p>                                                                                                                                                                                                                                                                                                   |

| Theme                                                  | Subtheme                             | Explanatory Narratives                                                                                                                                                                                                                                                                                                                                                                                                                                                                                                                                                                                                                                                                                                                                        |
|--------------------------------------------------------|--------------------------------------|---------------------------------------------------------------------------------------------------------------------------------------------------------------------------------------------------------------------------------------------------------------------------------------------------------------------------------------------------------------------------------------------------------------------------------------------------------------------------------------------------------------------------------------------------------------------------------------------------------------------------------------------------------------------------------------------------------------------------------------------------------------|
| <b>Theme 4:<br/>Perceived facilitators of learning</b> | Amicable learning environment        | <p>Learning in a respectful environment that will be non-intimidating or non-judgemental ( <b>Pype et al, 2014(a) [23]</b>) Learning that happens in a safe and trusted environment(<b>Pype et al, 2014(b) [24]</b>) where mentors are not be reprimanding (<b>Pype et al, 2014 (a) [23]</b>) (<b>Pype et al, 2014 (b)[24]</b>)</p> <p>Learning that does not expose their deficiency to their patients(<b>Pype et al, 2014(a) [23]</b>)</p>                                                                                                                                                                                                                                                                                                                  |
|                                                        | Preference for mentor and peer group | <p>Multidisciplinary mentors(<b>Pype et al., 2014(a) [23]</b>) (<b>Lloyd-William et al., 2006 [54]</b>) (<b>Magee and Koffman, 2016 [48]</b>) including GP colleagues(<b>Meijler et al., 2005 [46]</b>) (<b>Magee &amp; Koffman, 2016 [48]</b>) palliative physicians and palliative care nurse(<b>Magee and Koffman, 2016 [48]</b>)</p> <p>Small multidisciplinary peer group(<b>Becker et al., 2010 [40]</b>) (<b>Magee and Koffman, 2016 [48]</b>) (<b>Pype et al., 2014(a) [23]</b>) (<b>Hermann et al., 2019 [36]</b>)</p>                                                                                                                                                                                                                               |
|                                                        | Preference for timing of training    | <p>Evening courses(<b>Becker et al., 2010 [40]</b>)</p> <p>Weekend courses(<b>Becker et al., 2010 [40]</b>) (<b>Straatman et al., 2013 [41]</b>)</p> <p>Half day workshop(<b>Samaroo et al., 1993 [53]</b>)</p> <p>Quarterly topical in-service training(<b>Samaroo et al., 1993 [53]</b>)</p> <p>One day on-site training(<b>Samaroo et al., 1993 [53]</b>)</p> <p>Quarterly case rounds(<b>Samaroo et al., 1993 [53]</b>)</p> <p>Learning as being ongoing and lifelong(<b>Pype et al., 2014(a) [23]</b>) (<b>Hermann et al., 2019 [36]</b>)</p> <p>Out of business hours(<b>Hermann et al., 2019 [36]</b>)</p>                                                                                                                                             |
|                                                        | Preference for feedback              | <p>Patient and family feedback was most preferred but if done sensitively (<b>Selman et al., 2017 [22]</b>) (<b>O'Connor et al., 2014 [38]</b>)</p> <p>Timing of the feedback was important and wanted it filled by familiar face as otherwise they feared low return rates(through posts) (<b>Selman et al., 2017 [22]</b>)</p> <p>Apprehension of negative feedback from patient and family (<b>Selman et al., 2017 [22]</b>)</p> <p>Preferred to avoid feedback from dying patient or a family as it would cause discomfort to them (<b>Selman et al., 2017 [22]</b>)</p> <p>Preferred feedback from specialists (<b>Pype et al. 2014(a) [23]</b>)</p> <p>Feedback from members in the team in a trusted environment(<b>Pype et al., 2014(b) [24]</b>)</p> |

|  |  |                                                                                                                                                                                                                                                                                                                                                                                                                             |
|--|--|-----------------------------------------------------------------------------------------------------------------------------------------------------------------------------------------------------------------------------------------------------------------------------------------------------------------------------------------------------------------------------------------------------------------------------|
|  |  | <p>Behavioural assessment using videotaping or simulation(<b>Selman et al., 2017 [22]</b>) (<b>Jhonston et al., 2001 [55]</b>) was questioned as GPs felt this could be rehearsed</p> <p>Self-assessment forms were considered of limited use although GPs filled it sincerely (<b>Selman et al., 2017 [22]</b>)</p> <p>Self-assessment forms were filled if they were not too lengthy(<b>Selman et al., 2017 [22]</b>)</p> |
|--|--|-----------------------------------------------------------------------------------------------------------------------------------------------------------------------------------------------------------------------------------------------------------------------------------------------------------------------------------------------------------------------------------------------------------------------------|

| <b>Theme 5:</b>                       | <b>Subtheme</b>                               | <b>Explanatory Narratives</b>                                                                                                                                                                                                                                                                                                                                                                                                                                                                                                                                                                                                                                                                                                                                                                                                                                                                                                                                                               |
|---------------------------------------|-----------------------------------------------|---------------------------------------------------------------------------------------------------------------------------------------------------------------------------------------------------------------------------------------------------------------------------------------------------------------------------------------------------------------------------------------------------------------------------------------------------------------------------------------------------------------------------------------------------------------------------------------------------------------------------------------------------------------------------------------------------------------------------------------------------------------------------------------------------------------------------------------------------------------------------------------------------------------------------------------------------------------------------------------------|
| <b>Perceived Barriers of Learning</b> |                                               |                                                                                                                                                                                                                                                                                                                                                                                                                                                                                                                                                                                                                                                                                                                                                                                                                                                                                                                                                                                             |
| <b>Dispositional barriers</b>         | <b>Diffidence to discuss end of life care</b> | <p>Guilt or hopelessness of not having confidence in caring for dying patient(<b>Junger et al., 2010 [47]</b>)</p> <p>Taboo about discussion around death and dying(<b>Assing Hvidt et al, 2016 [39]</b>) (<b>Junger et al, 2010 [47]</b>)</p> <p>Fear of causing discomfort to patient and family about aspects such as spirituality and religion(<b>Assing Hvidt et al, 2016 [39]</b>)</p> <p>Fear of invading the private space- spiritual space is private to patient/family(<b>Assing Hvidt et al, 2016 [39]</b>)</p> <p>Fear of blame or medico-legal recrimination for wrong doing (<b>Taubert et al, 2011 [43]</b>) (<b>Meijler et al, 2005 [46]</b>)</p>                                                                                                                                                                                                                                                                                                                           |
| <b>Situational barriers</b>           | <b>Challenges at an individual level</b>      | <p>Younger GPs with less years of experience have less autonomy to focus on specific specialty (<b>Assing Hvidt et al.,2016 [39]</b>) (<b>Barcley et al, 2013 [49]</b>) (<b>Rhee et al, 2008 [44]</b>)</p> <p>Insecurity to broach their deficiency in knowledge can inhibit their inclination to learn(<b>Taubert et al, 2011 [43]</b>)</p> <p>Lower incidence of palliative care patients results in less motivation of GPs to learn(<b>Shipman et al, 2002 [52]</b>) (<b>Selman et al, 2017 [22]</b>)</p> <p>Less sick patients had less palliative care needed(<b>Rhee et al, 2018 [45]</b>)</p> <p>Perception of having sufficient knowledge(<b>Shipman et al, 2002 [52]</b>) and no new developments in the field of palliative care(<b>O'Connor et al, 2006 [37]</b>) (<b>O'Connor et al, 2014 [38]</b>)</p> <p>Personal/family commitment gives less time to training(<b>Rhee et al, 2008 [44]</b>)</p> <p>Care as being emotionally draining(<b>O'Connor et al, 2006 [37]</b>)</p> |
|                                       | <b>Resource constraints</b>                   | <p>General practitioners felt that there was a lack of systematic or standardised guidelines to help address palliative care needs (<b>Assing Hvidt et al, 2016 [39]</b>) (<b>Hermann et al, 2019 [36]</b>) or knowledge of resources where their patients could be referred for specialised care (<b>Assing Hvidt et al, 2016 [39]</b>). Rural general practitioners or general practitioners who had solo or small practice had less support system that limited their access to training (<b>O'Connor et al, 2006 [37]</b>) (<b>Shipman et al, 2001 [51]</b>) (<b>Junger et al, 2010 [47]</b>) (<b>Barcley et al, 2003 [49]</b>)</p>                                                                                                                                                                                                                                                                                                                                                     |
| <b>Professional barriers</b>          | <b>Challenges at professional level</b>       | <p>Excess work pressure with resultant lack of time as a constraint to learning(<b>Shipman et al, 2002 [52]</b>) (<b>Assing Hvidt et al, 2016 [39]</b>) (<b>Rhee et al, 2008 [44]</b>) (<b>Pyper et al, 2014(a) [23]</b>) (<b>Jhonston et al, 2001 [55]</b>) (<b>Hermann, et al, 2019 [36]</b>) (<b>Selman et al, 2017 [22]</b>) (<b>O'Connor et al, 2006 [37]</b>) (<b>Meijler et al, 2005 [46]</b>)</p>                                                                                                                                                                                                                                                                                                                                                                                                                                                                                                                                                                                   |

|                         |                                                    |                                                                                                                                                                                                                                                                                                                                                                                                                                                                                                                                                                                                                                                                                                                                                                                                                                                                                                                                                                                                                                                                                                                 |
|-------------------------|----------------------------------------------------|-----------------------------------------------------------------------------------------------------------------------------------------------------------------------------------------------------------------------------------------------------------------------------------------------------------------------------------------------------------------------------------------------------------------------------------------------------------------------------------------------------------------------------------------------------------------------------------------------------------------------------------------------------------------------------------------------------------------------------------------------------------------------------------------------------------------------------------------------------------------------------------------------------------------------------------------------------------------------------------------------------------------------------------------------------------------------------------------------------------------|
|                         |                                                    | <p>Remuneration incommensurate with the work done(<b>Rhee et al, 2008 [44]</b>) (<b>Hermann et al, 2019 [45]</b>)</p> <p>Having to self-fund their course(<b>Jhonston et al, 2001 [55]</b>)</p> <p>Self-expense for organizing locum in their absenteeism from work(<b>Jhonston et al, 2001 [55]</b>)</p> <p>Temporary job or temporary time/shift patterns at work gives less opportunity to learning on job or reflective learning (O'Connor et al, 2006 [37]) (Taubert et al, 2011 [43])</p>                                                                                                                                                                                                                                                                                                                                                                                                                                                                                                                                                                                                                 |
|                         | <b>Disempowerment of General practitioners</b>     | <p>Referral to specialists or experienced GPs(<b>Selman et al, 2017 [22]</b>) and when specialists take over the care (<b>Rhee et al, 2008 [44]</b>) (<b>Pype et al, 2014 (a)[23]</b>) leads to loss of control (<b>O'Connor et al, 2006 [37]</b>)</p> <p>Lack of trust in GPs by specialists(<b>Selman et al, 2017 [22]</b>)</p> <p>Do not consider GPs as doing a worthwhile job in EOLC(<b>Selman et al, 2017 [22]</b>)</p> <p>GPs do not feel recognized for their job(<b>Hermann et al, 2019 [36]</b>) (<b>Meijler et al, 2005 [46]</b>) or appreciated for their work(<b>Hermann et al, 2019 [36]</b>)</p> <p>Patients lack trust in general practitioner's ability to care(<b>Hermann et al, 2019 [36]</b>)</p> <p>Inability to address patient's needs instilled a fear of strain in doctor-patient relationship(<b>Meijler et al, 2005 [46]</b>)</p>                                                                                                                                                                                                                                                   |
|                         | <b>Conflict in care provision</b>                  | <p>Lack of clarity in roles and responsibilities (<b>Pype et al, 2014 (a)[23]</b>) (<b>O'Connor et al, 2014 [38]</b>) (<b>Shipman et al, 2002[52]</b>)</p> <p>Fear of confronting specialists in a conflict in treatment(<b>Shipman et al, 2002 [52]</b>)</p> <p>Fear of being reprimanded/accused by specialists(<b>Shipman et al, 2002 [52]</b>)</p> <p>Delay in response from specialists (<b>Shipman et al, 2002 [52]</b>)</p> <p>Past bitter experience with specialists can inhibit future interaction with specialists(<b>Shipman et al, 2002 [52]</b>)</p>                                                                                                                                                                                                                                                                                                                                                                                                                                                                                                                                              |
| <b>Academic barrier</b> | <b>Training not aligned with clinical practice</b> | <p>Most trainings being oncology focused gives them less opportunity to learn non malignant palliative care which comprises major part of their practice(<b>Shipman et al, 2001 [51]</b>)</p> <p>Lack of locally based training resources(<b>Jhonston et al, 2001 [55]</b>) (<b>Hermann et al, 2019 [36]</b>) or counseling support(<b>O'Connor et al, 2014 [38]</b>)</p> <p>Lack of consistency in training due to poor communication and documentation by specialists(<b>O'Connor et al, 2014 [38]</b>)</p> <p>Most trainings are in-hour to which GPs have less exposure (Taubert et al, 2011 [43])</p> <p>Lack of same structure and resources in the community as in the hospital leads to inability to replicate the training acquired in the hospital back in the community (<b>Pype et al, 2014 (a) [23]</b>)</p> <p>Lack of accreditation of palliative care(<b>Hermann et al, 2019 [36]</b>)</p> <p>Lack of exposure to community during training period(<b>Selman et al, 2017 [22]</b>)</p> <p>Training also depends on trainer's inclination to palliative care(<b>Selman et al, 2017 [22]</b>)</p> |
