# Supplementary figures and images for: Views of general practitioners on end-of-life care learning preferences: A systematic review
Source: Research Square preprint supplement (doi:10.21203/rs.3.rs-1382711/v1), 2022-03-17

## Appendix 5: Thematic diagram of General Practitioner's End-of-Life Care learning preferences

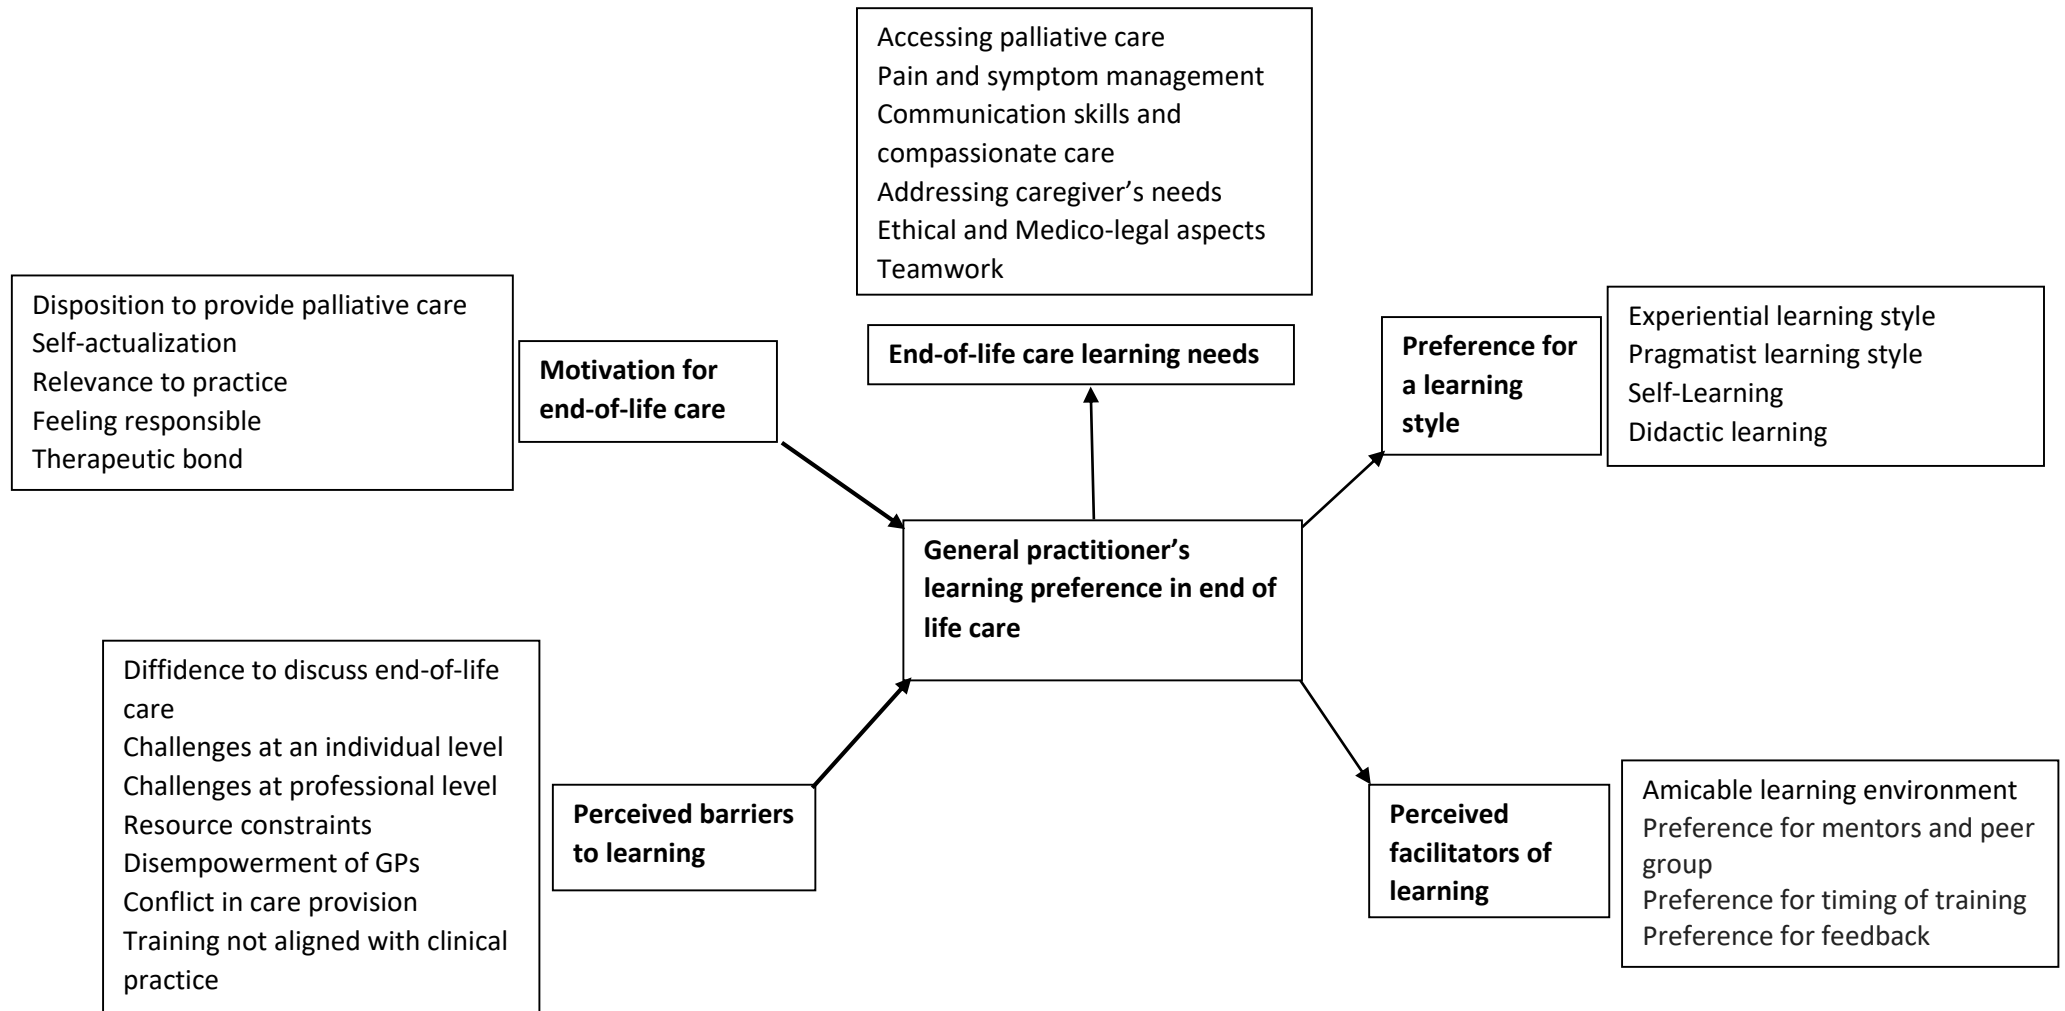

Supplement: Supplementary file 1 [file 1249c2088ab4fb0240552fcb.pdf]
